# Supplementary material for: Polyphyly of the extinct family Oviparosiphidae and its implications for inferring aphid evolution (Hemiptera, Sternorrhyncha)
Source: PLoS One. 2017 Apr 26;12(4):e0174791. doi: 10.1371/journal.pone.0174791 (PMC5405925; doi:10.1371/journal.pone.0174791)
Supplement: S1 File — (NEX) [file pone.0174791.s001.nex]

#NEXUS
[written Fri Jun 10 12:45:31 CEST 2016 by Mesquite  version 3.03 (build 702) at ZN11248.local/10.61.212.54]

BEGIN TAXA;
	TITLE Taxa;
	DIMENSIONS NTAX=14;
	TAXLABELS
		Juraphis_crassipes Daoaphis_magnalata Oviparosiphum_jakovlevi Archeoviparosiphum_baisense Acathotrichaphis_paulisensoriata Dinaphis_multisensoriata Khotontaphis_lachnoides Vitimaphis_rasnitsyni Vitimaphis_subridens Bajsaphis_kononovae Bajsaphis_pulchra Alloambria_caudata Canadaphis_carpenteri Pseudambria_longirostris 
	;

END;


BEGIN CHARACTERS;
	TITLE  Character_Matrix;
	DIMENSIONS  NCHAR=39;
	FORMAT DATATYPE = STANDARD GAP = - MISSING = ? SYMBOLS = "  0 1 2 3";
	MATRIX
	Juraphis_crassipes                0000000010011000000100-10100000020-0000
	Daoaphis_magnalata                000010011101100000101030011100002100000
	Oviparosiphum_jakovlevi           0000?0??????????01?01010010000101110000
	Archeoviparosiphum_baisense       000?10011101011001001000010001112100000
	Acathotrichaphis_paulisensoriata  0????0011102111000?010200110001021?0001
	Dinaphis_multisensoriata          0001?0000001101001001010010000112??0000
	Khotontaphis_lachnoides           0100?001?012101001?01011010000112110001
	Vitimaphis_rasnitsyni             0100?0000000111001101020010100102110010
	Vitimaphis_subridens              0100?000000001100??01020010100102110010
	Bajsaphis_kononovae               0000?0011112111001101020010100100100110
	Bajsaphis_pulchra                 0100?0011112111001001020012100100100110
	Alloambria_caudata                111-?1111102111111111020100211112??1010
	Canadaphis_carpenteri             1???111010021111?0101020100200102??1010
	Pseudambria_longirostris          1???111100021111101011--1012?0102??1010

;

END;
BEGIN ASSUMPTIONS;
	TYPESET * UNTITLED   =  unord:  1 -  39;

END;

BEGIN MESQUITECHARMODELS;
	ProbModelSet * UNTITLED   =  'Mk1 (est.)':  1 -  39;
END;

Begin MESQUITE;
		MESQUITESCRIPTVERSION 2;
		TITLE AUTO;
		tell ProjectCoordinator;
		timeSaved 1465555531452;
		getEmployee #mesquite.minimal.ManageTaxa.ManageTaxa;
		tell It;
			setID 0 7253394351951370161;
			tell It;
				setDefaultOrder  0 1 2 3 4 5 6 7 13 8 27 9 10 24;
				attachments ;
			endTell;
		endTell;
		getEmployee #mesquite.charMatrices.ManageCharacters.ManageCharacters;
		tell It;
			setID 0 1602102411246601966;
			tell It;
				setDefaultOrder  0 1 2 3 50 4 5 6 7 8 9 39 10 12 13 14 15 18 20 21 22 44 23 25 43 26 28 29 30 31 32 33 37 38 60 61 47 45 40;
				attachments ;
			endTell;
			mqVersion 303;
			checksumv 0 3 3917481053 null  getNumChars 39 numChars 39 getNumTaxa 14 numTaxa 14   short true   bits 15   states 15   sumSquaresStatesOnly 1560.0 sumSquares 1560.0 longCompressibleToShort false usingShortMatrix true   NumFiles 1 NumMatrices 1;
			mqVersion;
		endTell;
		getWindow;
		tell It;
			suppress;
			setResourcesState false false 100;
			setPopoutState 400;
			setExplanationSize 0;
			setAnnotationSize 0;
			setFontIncAnnot 0;
			setFontIncExp 0;
			setSize 1276 627;
			setLocation 0 23;
			setFont SanSerif;
			setFontSize 10;
			getToolPalette;
			tell It;
			endTell;
			desuppress;
		endTell;
		getEmployee  #mesquite.charMatrices.BasicDataWindowCoord.BasicDataWindowCoord;
		tell It;
			showDataWindow #1602102411246601966 #mesquite.charMatrices.BasicDataWindowMaker.BasicDataWindowMaker;
			tell It;
				getWindow;
				tell It;
					getTable;
					tell It;
						rowNamesWidth 118;
					endTell;
					setExplanationSize 30;
					setAnnotationSize 20;
					setFontIncAnnot 0;
					setFontIncExp 0;
					setSize 1176 555;
					setLocation 0 23;
					setFont SanSerif;
					setFontSize 10;
					getToolPalette;
					tell It;
						setTool mesquite.charMatrices.BasicDataWindowMaker.BasicDataWindow.ibeam;
					endTell;
					setActive;
					setTool mesquite.charMatrices.BasicDataWindowMaker.BasicDataWindow.ibeam;
					colorCells  #mesquite.charMatrices.NoColor.NoColor;
					colorRowNames  #mesquite.charMatrices.TaxonGroupColor.TaxonGroupColor;
					colorColumnNames  #mesquite.charMatrices.CharGroupColor.CharGroupColor;
					colorText  #mesquite.charMatrices.NoColor.NoColor;
					setBackground White;
					toggleShowNames on;
					toggleShowTaxonNames on;
					toggleTight off;
					toggleThinRows off;
					toggleShowChanges on;
					toggleSeparateLines off;
					toggleShowStates on;
					toggleAutoWCharNames on;
					toggleAutoTaxonNames off;
					toggleShowDefaultCharNames off;
					toggleConstrainCW on;
					toggleBirdsEye off;
					toggleShowPaleGrid off;
					toggleShowPaleCellColors off;
					toggleShowPaleExcluded off;
					togglePaleInapplicable on;
					toggleShowBoldCellText off;
					toggleAllowAutosize on;
					toggleColorsPanel off;
					toggleDiagonal on;
					setDiagonalHeight 80;
					toggleLinkedScrolling on;
					toggleScrollLinkedTables off;
				endTell;
				showWindow;
				getWindow;
				tell It;
					forceAutosize;
				endTell;
				getEmployee #mesquite.charMatrices.ColorByState.ColorByState;
				tell It;
					setStateLimit 9;
					toggleUniformMaximum on;
				endTell;
				getEmployee #mesquite.charMatrices.ColorCells.ColorCells;
				tell It;
					setColor Red;
					removeColor off;
				endTell;
				getEmployee #mesquite.categ.StateNamesStrip.StateNamesStrip;
				tell It;
					showStrip off;
				endTell;
				getEmployee #mesquite.charMatrices.AnnotPanel.AnnotPanel;
				tell It;
					togglePanel off;
				endTell;
				getEmployee #mesquite.charMatrices.CharReferenceStrip.CharReferenceStrip;
				tell It;
					showStrip off;
				endTell;
				getEmployee #mesquite.charMatrices.QuickKeySelector.QuickKeySelector;
				tell It;
					autotabOff;
				endTell;
				getEmployee #mesquite.charMatrices.SelSummaryStrip.SelSummaryStrip;
				tell It;
					showStrip off;
				endTell;
				getEmployee #mesquite.categ.SmallStateNamesEditor.SmallStateNamesEditor;
				tell It;
					panelOpen true;
				endTell;
			endTell;
		endTell;
		endTell;
end;
